# Supplementary material
Source: PubMed Central journal article supplement (PMC2829463)
Supplement: Supp_Fig.pdf [file Supp_Fig.pdf]

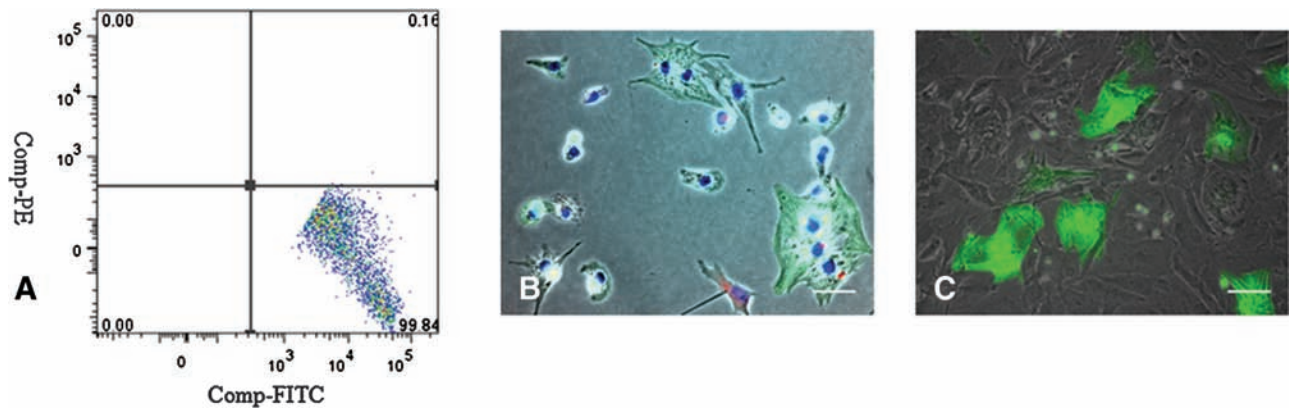

**SUPPLEMENTARY FIG. 1.** Purification and transduction of primary cardiomyocytes. (A) FACS data. (B) Immunofluorescence of primary cardiomyocytes after preplating and BrdU treatment, showing that most cells were troponin<sup>+</sup> (FITC)/vimentin<sup>-</sup> (PE or Texas red). (C) Primary cardiomyocytes transduced with lentiviral vector expressing GFP (MOI, 2). Scale bar: 50  $\mu$ m.

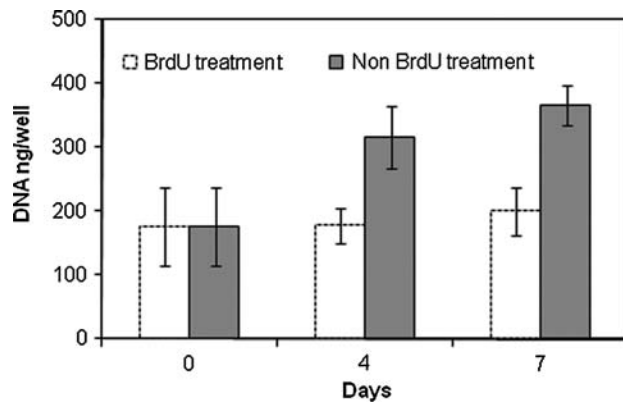

**SUPPLEMENTARY FIG. 2.** Proliferation of primary neonatal cardiomyocytes with BrdU or without BrdU treatment (100  $\mu$ M). Cell growth kinetics were monitored by measuring total DNA quantification. Cell culture medium was DMEM supplemented with 10% FBS, 10 mM HEPES, 2 mM L-glutamine, and penicillin-streptomycin (100 U/ml).

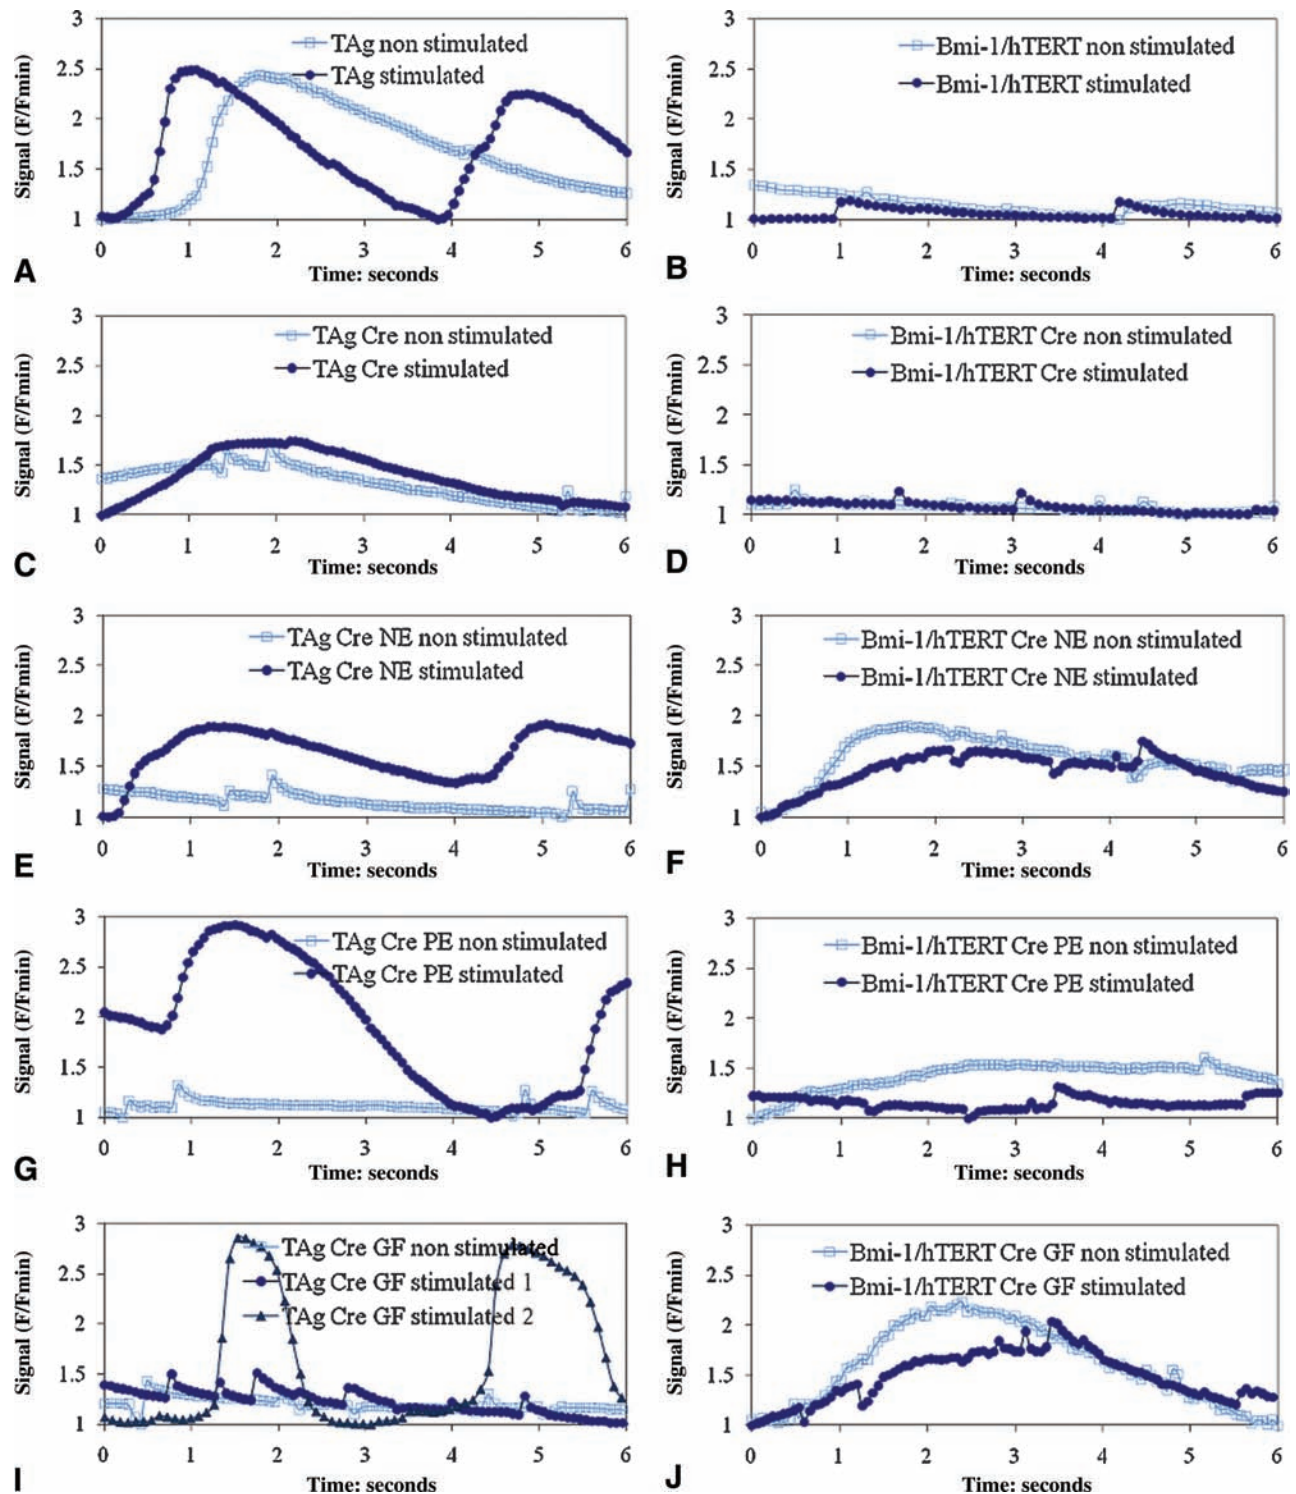

**SUPPLEMENTARY FIG. 3.** Calcium transient in TAG clone 8 and Bmi-1/hTERT clone 4. Spontaneous and paced calcium transient (stimulation: 34.2 V/cm, 0.3 Hz, 100 ms duration; stimulation 2: 34.2 V/cm, 1 Hz, 2 ms duration) in TAG clone 8 before (A) and after Cre expression (C), with NE (E), PE (G) or GF treatment (I). Spontaneous and paced calcium transient (stimulation: 34.2 V/cm, 0.3 Hz, 100 ms duration) in Bmi-1/hTERT clone 4 before (B) and after Cre expression (D), with NE (F), PE (H) or growth factor treatment (J). PE: phenylephrine 100  $\mu$ M; NE: norepinephrine 10  $\mu$ M; GF: 10 ng/ml VEGF, 150 ng/ml DKK1.
